# Supplementary material for: Does lipophilicity affect the effectiveness of a transmembrane anion transporter? Insight from squaramido-functionalized bis(choloyl) conjugates
Source: Royal Society of Chemistry journal article supplement (doi:10.1039/c5ob01920f), 2015-01-01
Supplement: c5ob01920f1.pdf [file c5ob01920f1.pdf]

Does lipophilicity affect the effectiveness of a transmembrane anion transporter?

Insight from squaramido-functionalized bis(choloyl) conjugates

Zhi Li, Li-Qun Deng, Jin-Xiang Chen, Chun-Qiong Zhou and Wen-Hua Chen \*

*School of Pharmaceutical Sciences, Southern Medical University, Guangzhou 510515, P. R. China*

### Supporting Information

**Figures S1~18.**  $^1\text{H}$  NMR,  $^{13}\text{C}$  NMR and HR-ESI-MS of compounds **1-6**

**Figures S19~25.** Ionophoric activity of compounds **1-6**

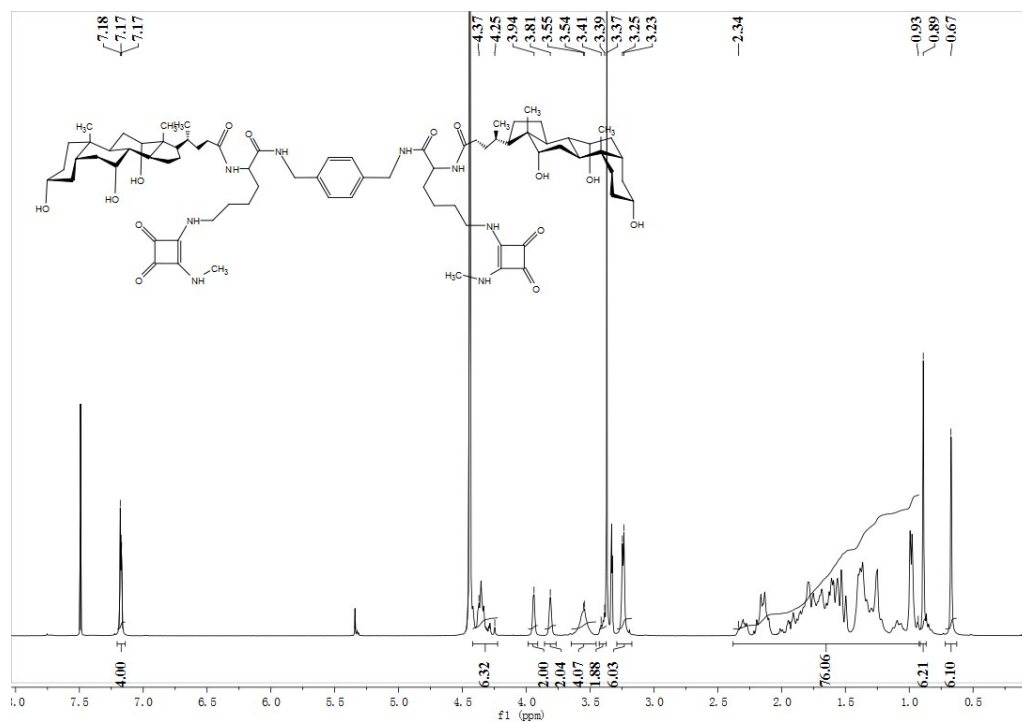

**Fig. S1.**  $^1\text{H-NMR}$  (400 MHz,  $\text{CDCl}_3/\text{CD}_3\text{OD} = 2/1$ ) of compound 1.

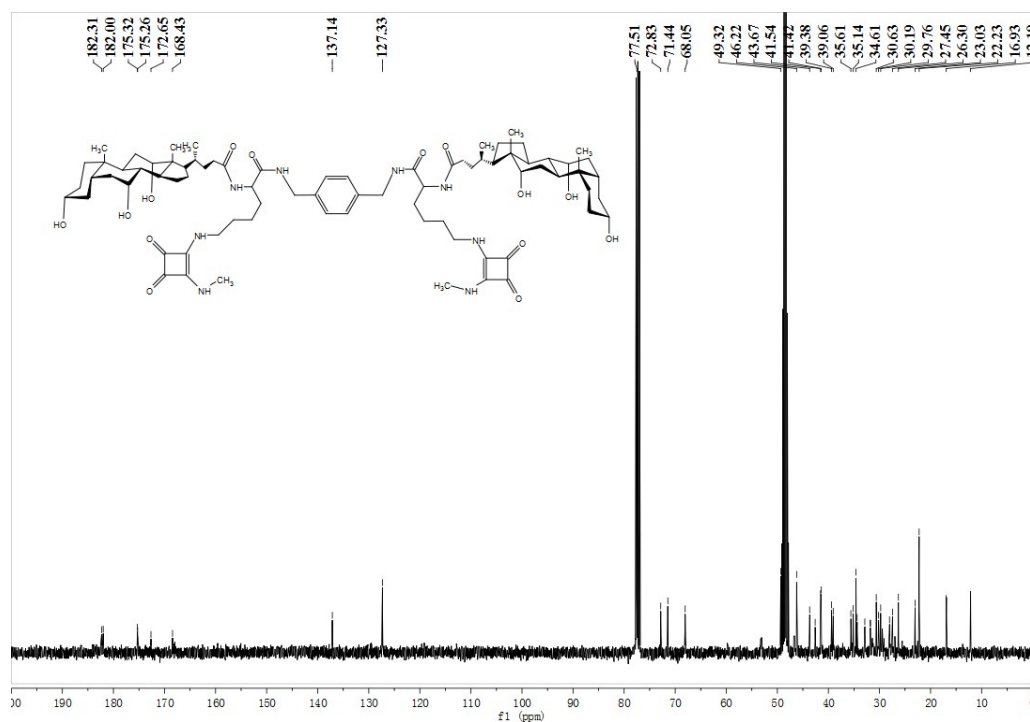

**Fig. S2.**  $^{13}\text{C-NMR}$  (100 MHz,  $\text{CDCl}_3/\text{CD}_3\text{OD}, 2/1$ ) of compound 1.

1501A0531-2#33 RT: 0.15 AV: 1 NL: 3.22E5  
T: FTMS - c ESI Full ms [100.00-2000.00]

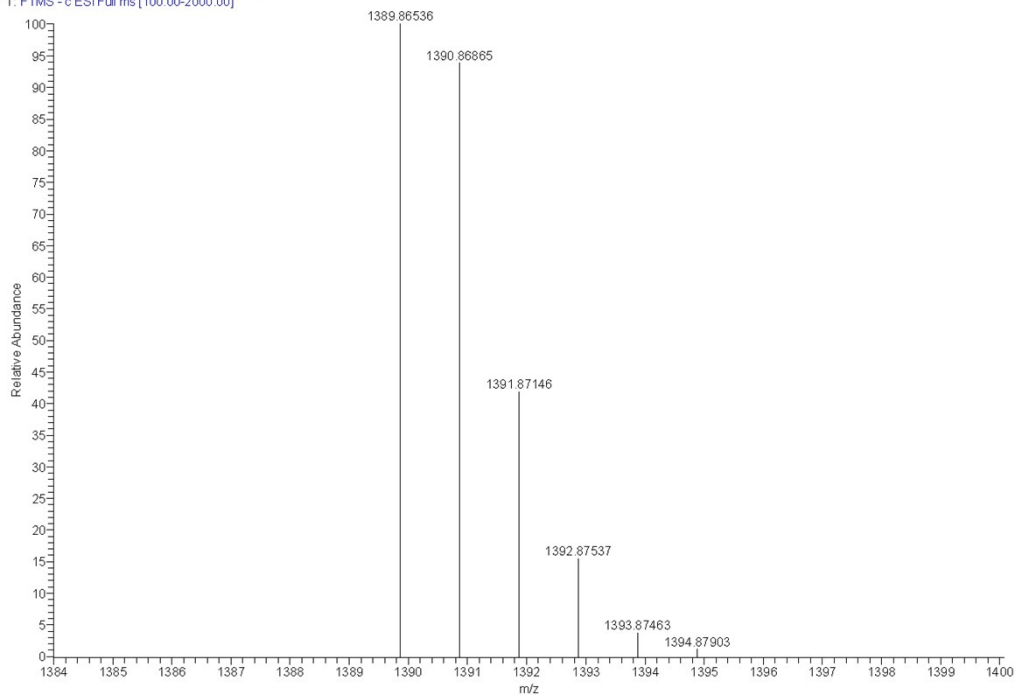

SPECTRUM - simulation:

| <i>m/z</i> | Theo. Mass | Delta (ppm) | RDB equiv. | Composition                                                     |
|------------|------------|-------------|------------|-----------------------------------------------------------------|
| 1389.86536 | 1389.86947 | -2.96       | 24.5       | C <sub>78</sub> H <sub>117</sub> O <sub>14</sub> N <sub>8</sub> |

**Fig. S3.** HR-ESI-MS of compound **1**.

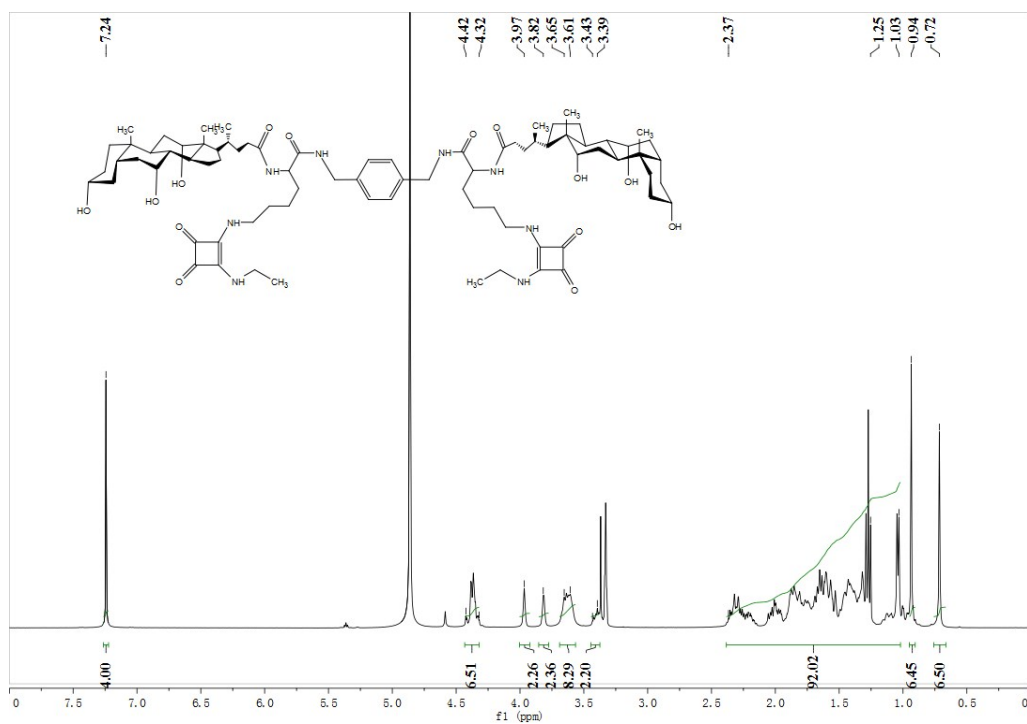

**Fig. S4.** <sup>1</sup>H-NMR (400 MHz, CD<sub>3</sub>OD) of compound **2**.

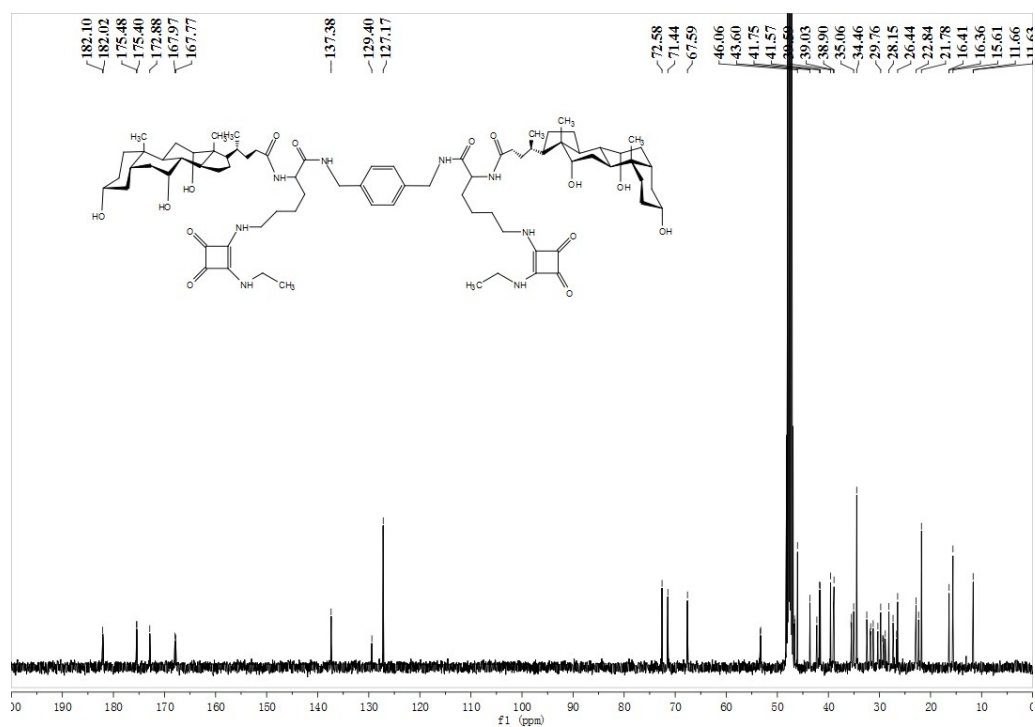

**Fig. S5.**  $^{13}\text{C}$ -NMR (100 MHz,  $\text{CD}_3\text{OD}$ ) of compound **2**.

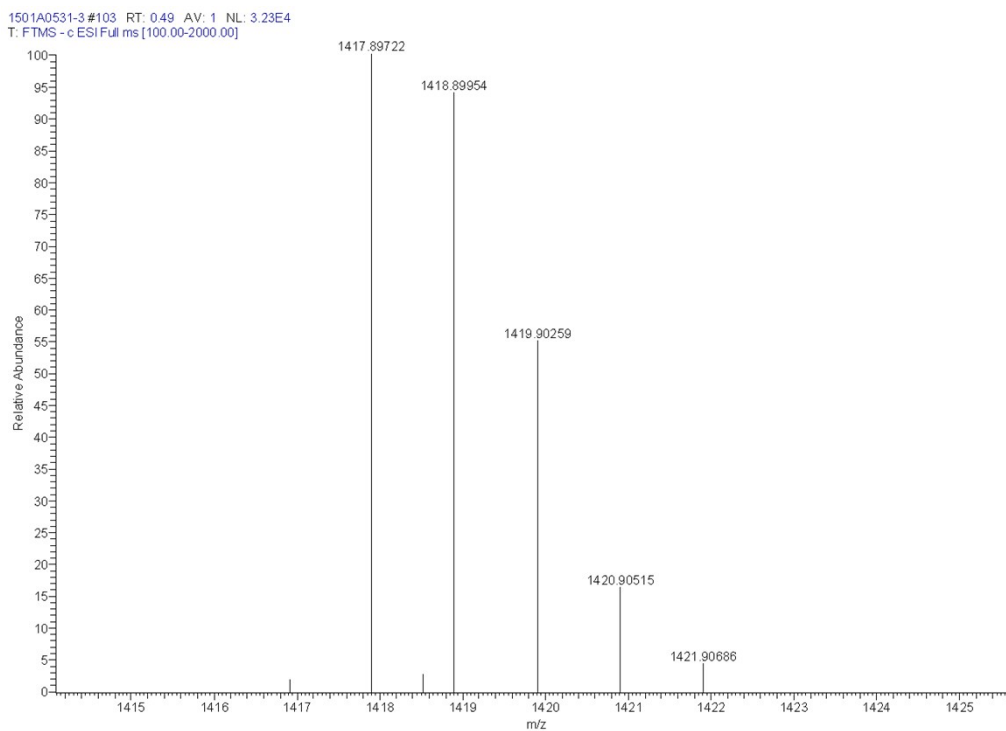

SPECTRUM - simulation:

| $m/z$      | Theo. Mass | Delta (ppm) | RDB equiv. | Composition                                          |
|------------|------------|-------------|------------|------------------------------------------------------|
| 1417.89722 | 1417.90077 | -2.51       | 24.5       | $\text{C}_{80}\text{H}_{121}\text{O}_{14}\text{N}_8$ |

**Fig. S6.** HR-ESI-MS of compound **2**.

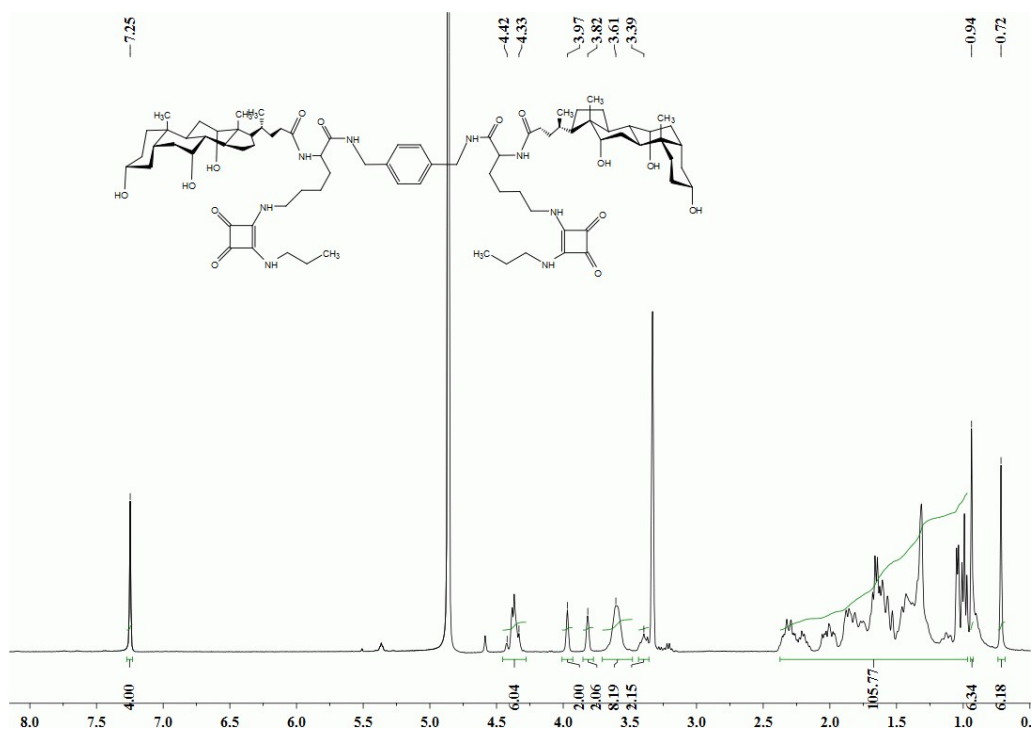

Fig. S7.  $^1\text{H-NMR}$  (400 MHz,  $\text{CD}_3\text{OD}$ ) of compound 3.

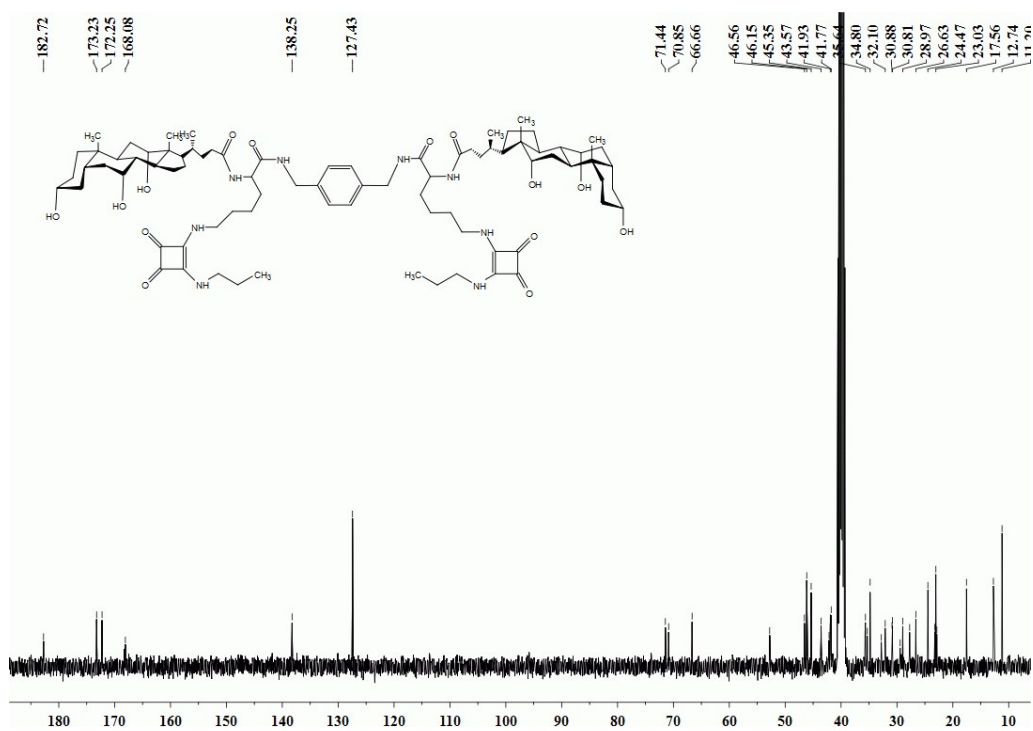

Fig. S8.  $^{13}\text{C-NMR}$  (100 MHz,  $d_6\text{-DMSO}$ ) of compound 3.

wangbo-05 #5 RT: 0.09 AV: 1 NL: 1.11E5  
T: FTMS - c ESI Full ms [100.00-2000.00]

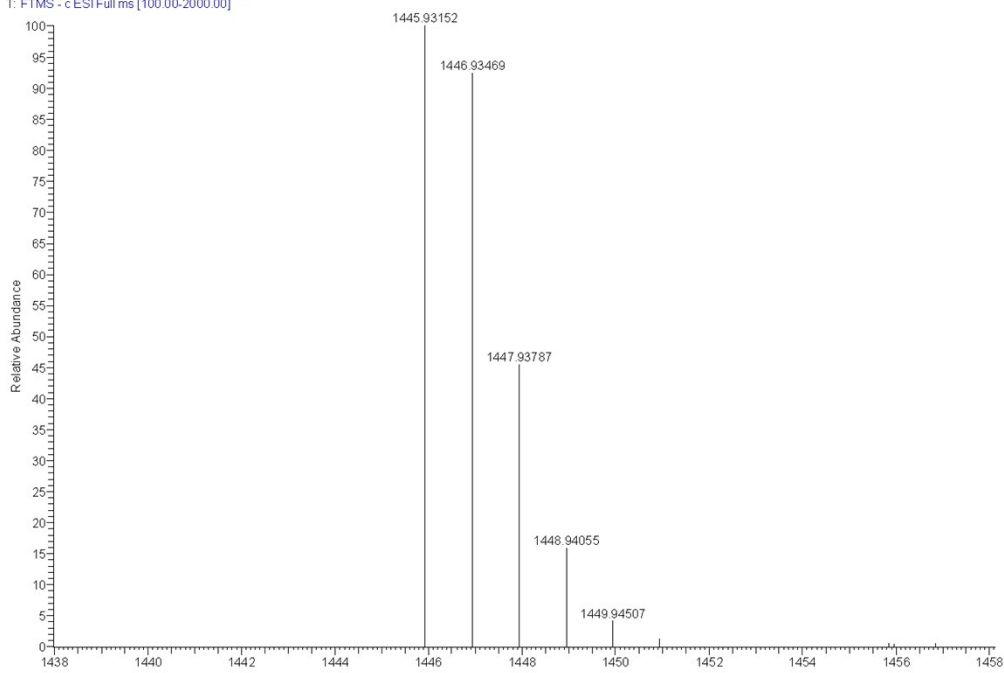

SPECTRUM - simulation:

| <i>m/z</i> | Theo. Mass | Delta (ppm) | RDB equiv. | Composition                                                     |
|------------|------------|-------------|------------|-----------------------------------------------------------------|
| 1445.93152 | 1445.93207 | -0.38       | 24.5       | C <sub>82</sub> H <sub>125</sub> O <sub>14</sub> N <sub>8</sub> |

Fig. S9. HR-ESI-MS of compound 3.

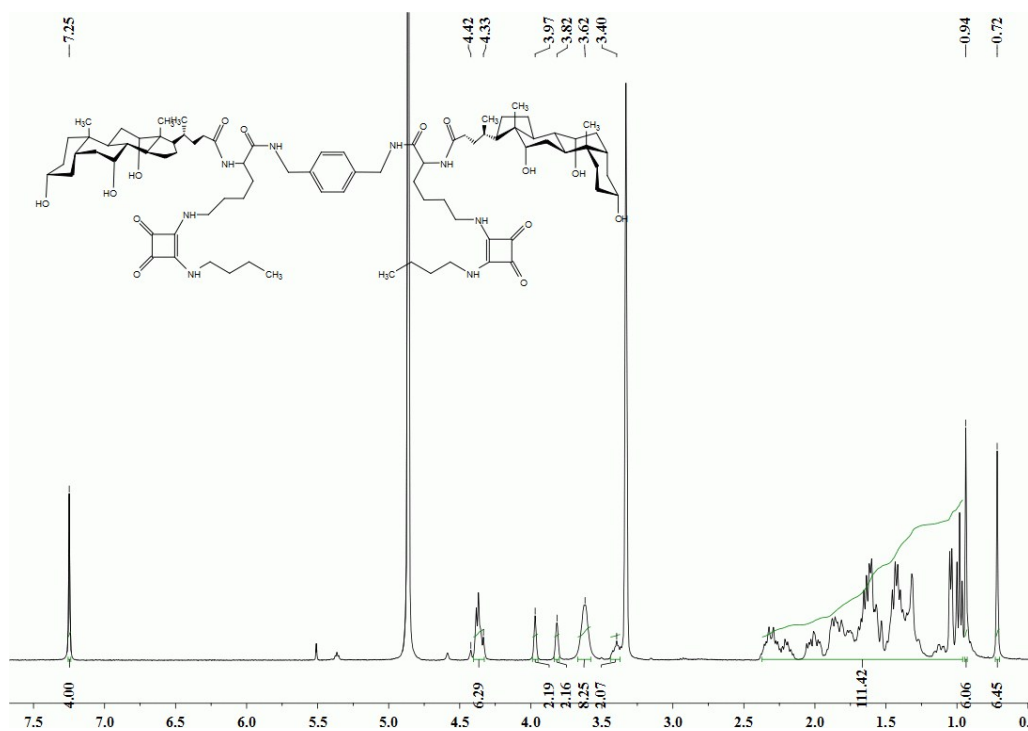

Fig. S10. <sup>1</sup>H-NMR (400 MHz, CD<sub>3</sub>OD) of compound 4.

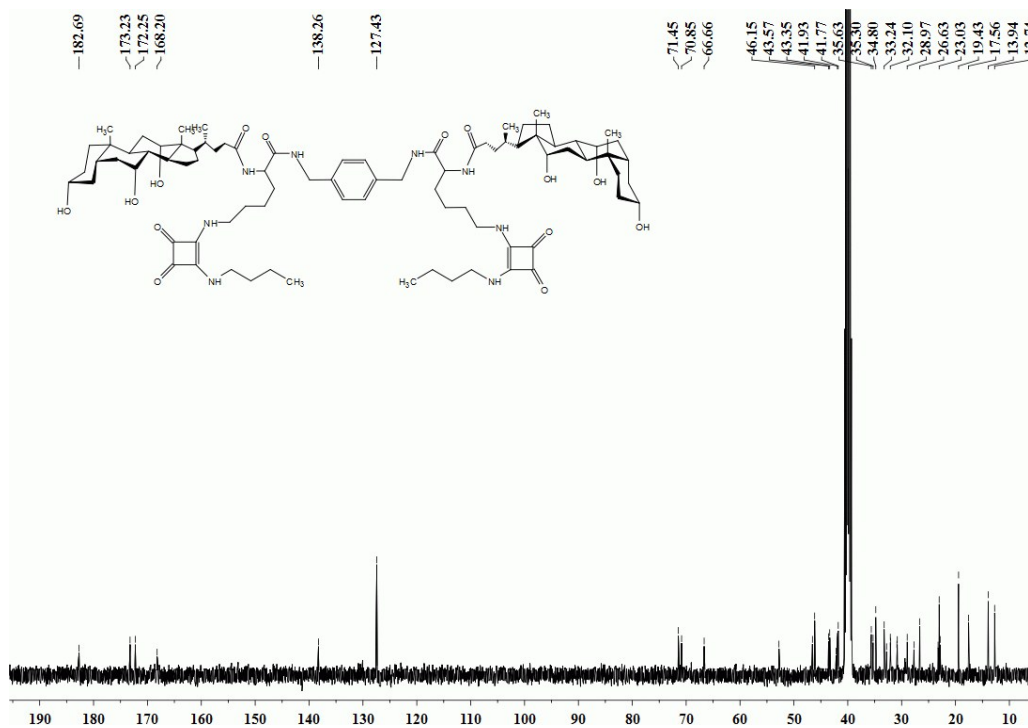

**Fig. S11.**  $^{13}\text{C}$ -NMR (100 MHz,  $d_6$ -DMSO) of compound **4**.

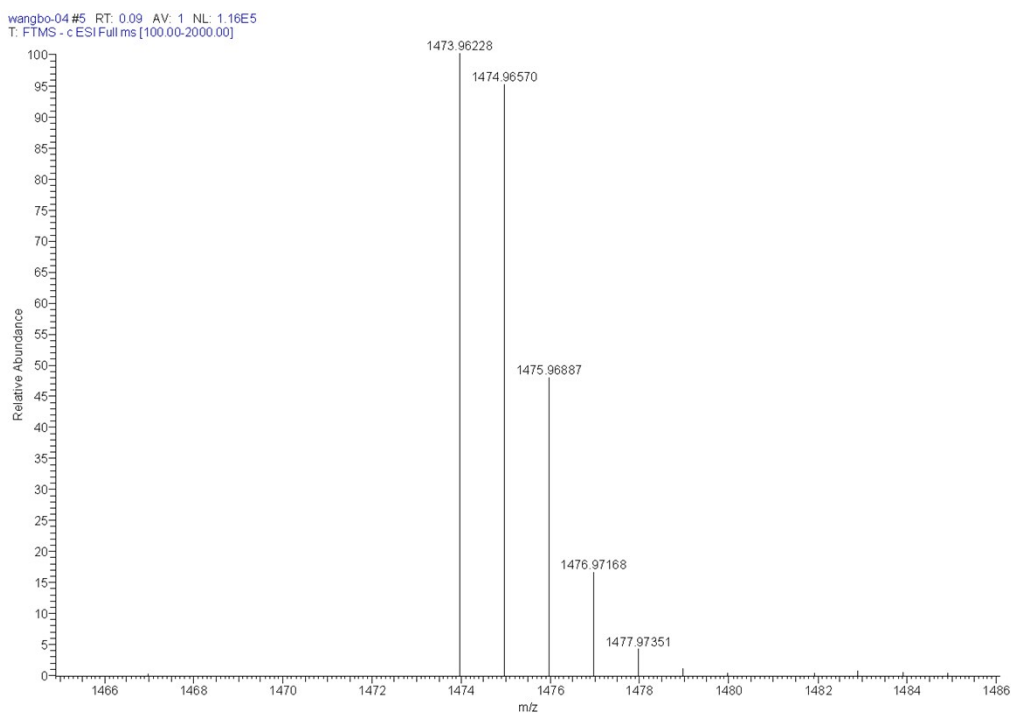

SPECTRUM - simulation:

| $m/z$      | Theo. Mass | Delta (ppm) | RDB equiv. | Composition                                          |
|------------|------------|-------------|------------|------------------------------------------------------|
| 1473.96228 | 1473.96337 | -0.74       | 24.5       | $\text{C}_{84}\text{H}_{129}\text{O}_{14}\text{N}_8$ |

**Fig. S12.** HR-ESI-MS of compound **4**.

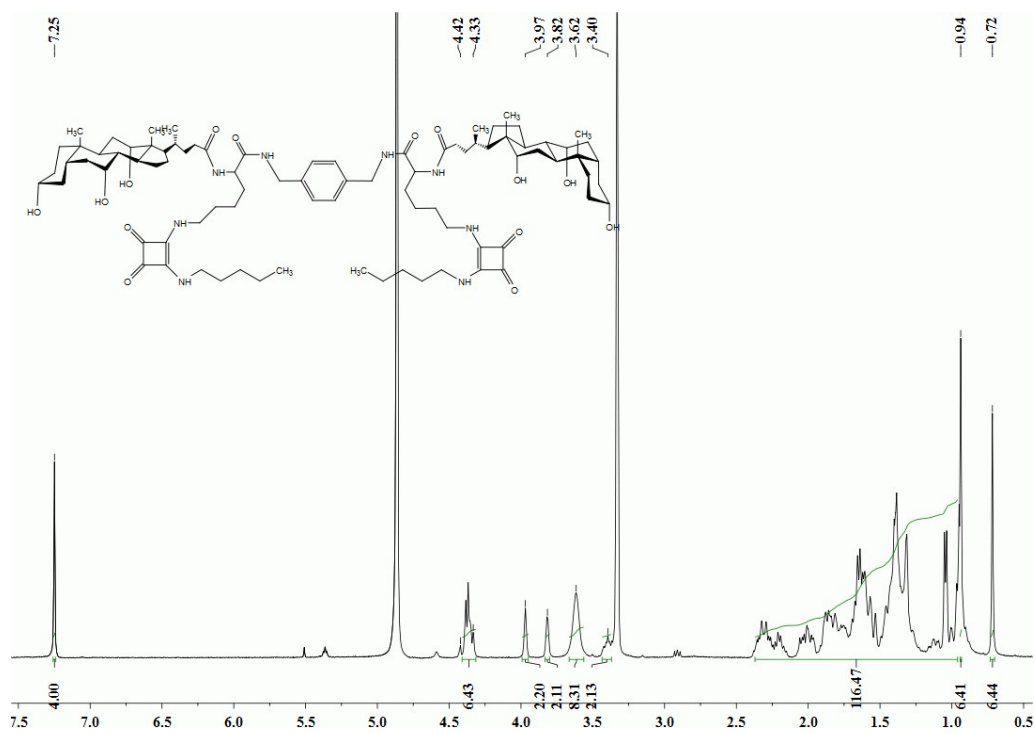

**Fig. S13.**  $^1\text{H-NMR}$  (400 MHz,  $\text{CD}_3\text{OD}$ ) of compound 5.

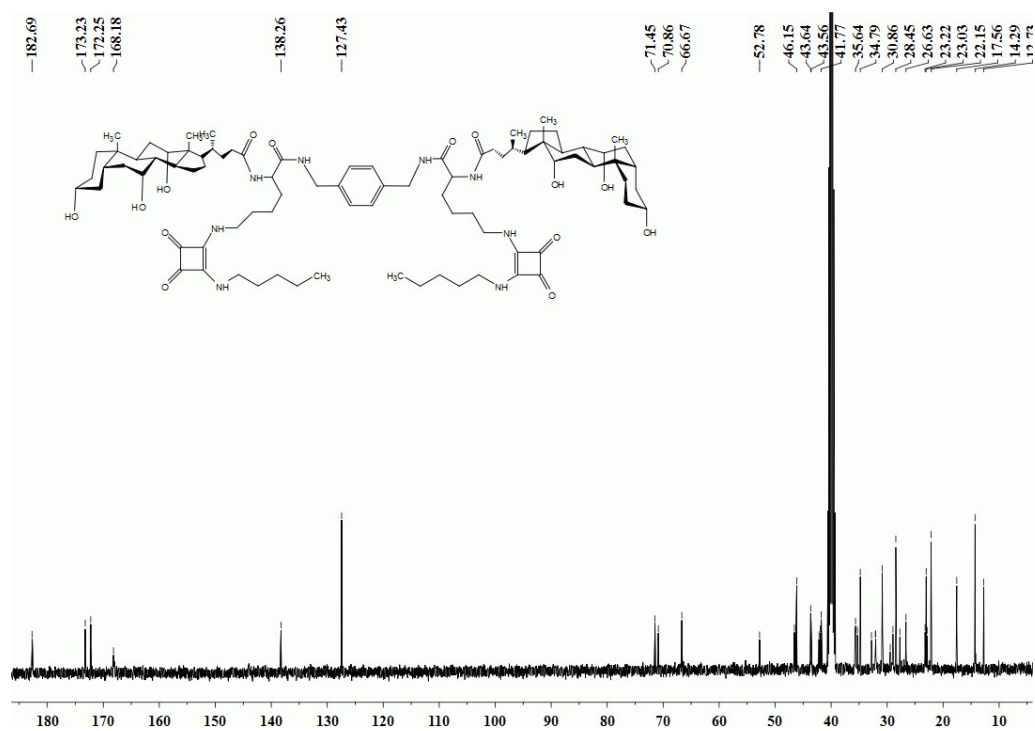

**Fig. S14.**  $^{13}\text{C-NMR}$  (100 MHz,  $d_5\text{-DMSO}$ ) of compound 5.



wangbo-07 #4-6 RT: 0.07-0.11 AV: 3 NL: 1.18E5  
T: FTMS - c ESI Full ms [100.00-2000.00]

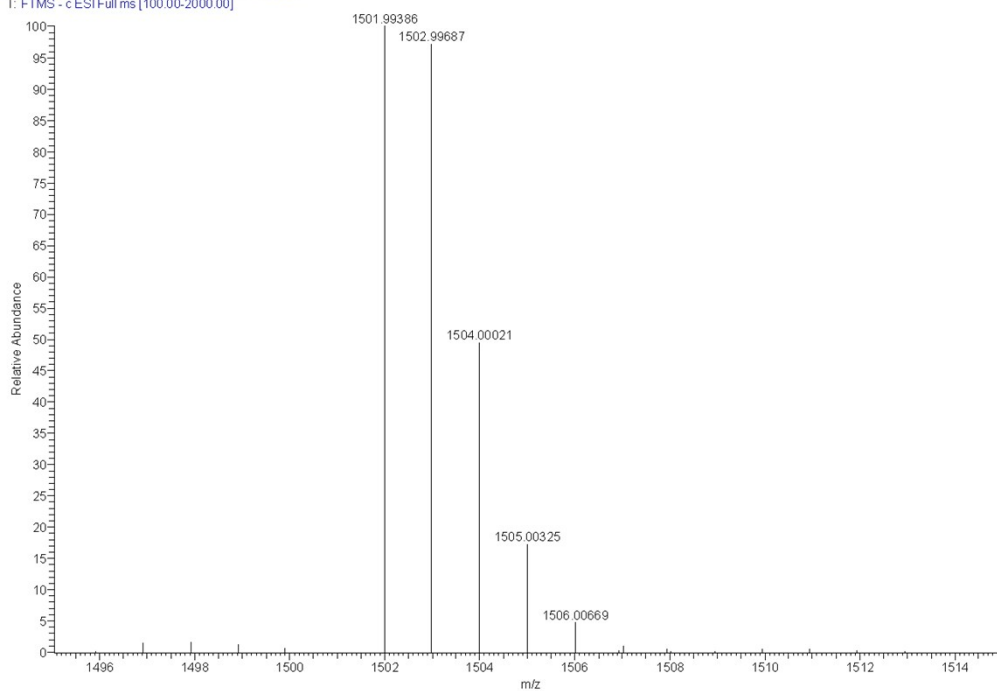

SPECTRUM - simulation:

| <i>m/z</i> | Theo. Mass | Delta (ppm) | RDB equiv. | Composition                                                     |
|------------|------------|-------------|------------|-----------------------------------------------------------------|
| 1501.99386 | 1501.99467 | -0.54       | 24.5       | C <sub>86</sub> H <sub>133</sub> O <sub>14</sub> N <sub>8</sub> |

Fig. S15. HR-ESI-MS of compound 5.

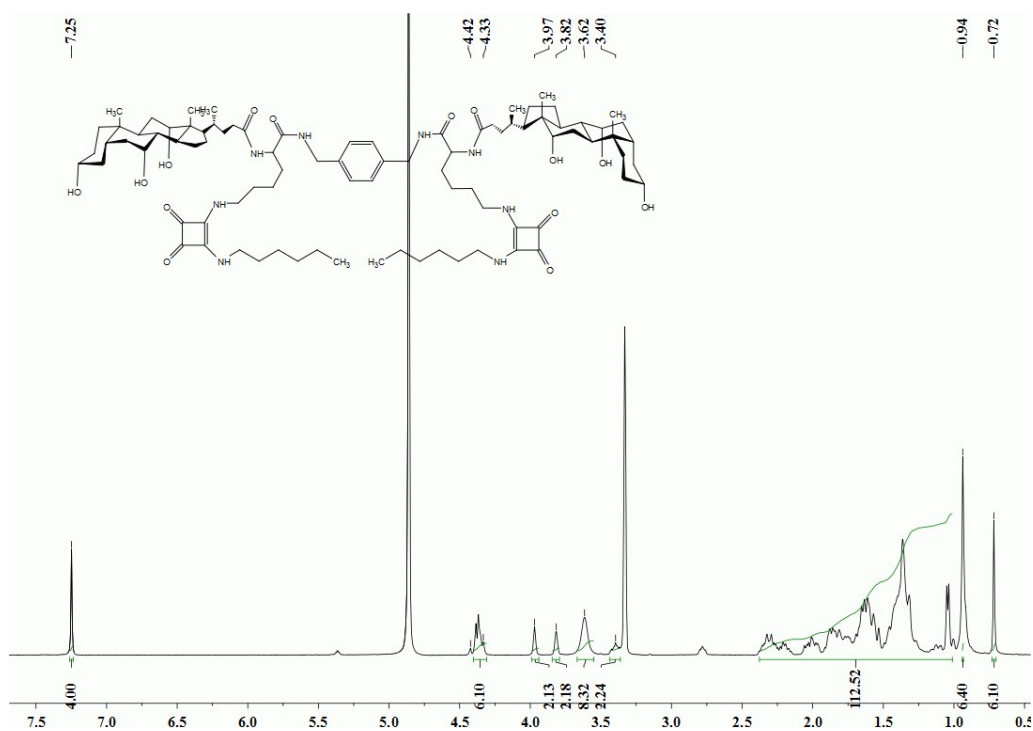

Figure S16. <sup>1</sup>H-NMR (400 MHz, CD<sub>3</sub>OD) of compound 6.

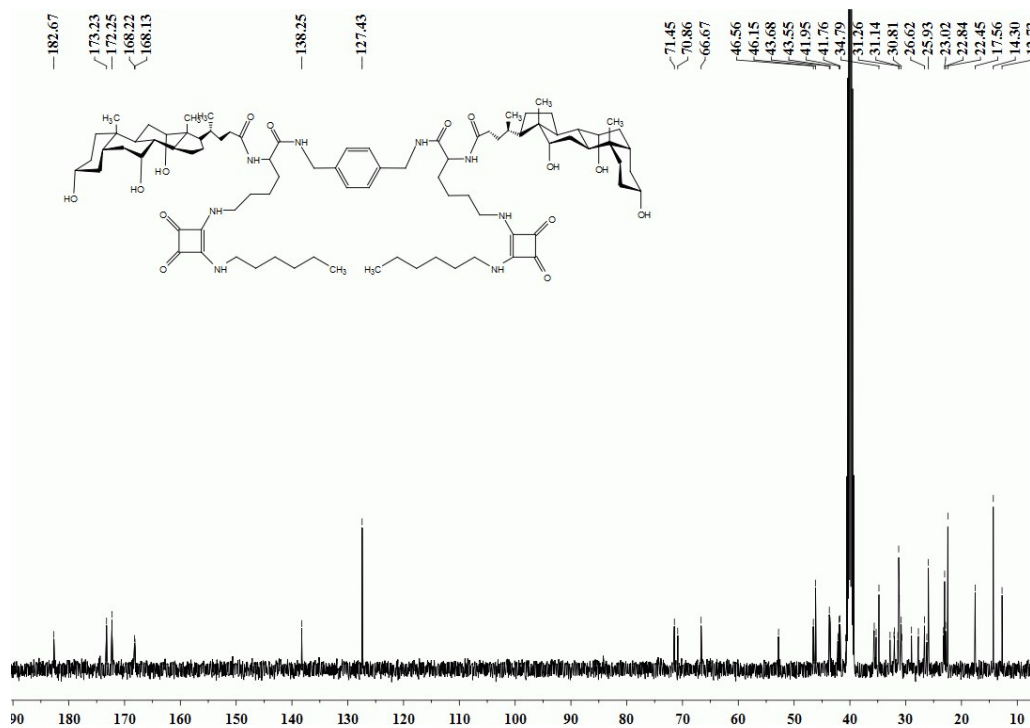

Figure S17.  $^{13}\text{C}$ -NMR (100 MHz,  $d_6$ -DMSO) of compound 6.

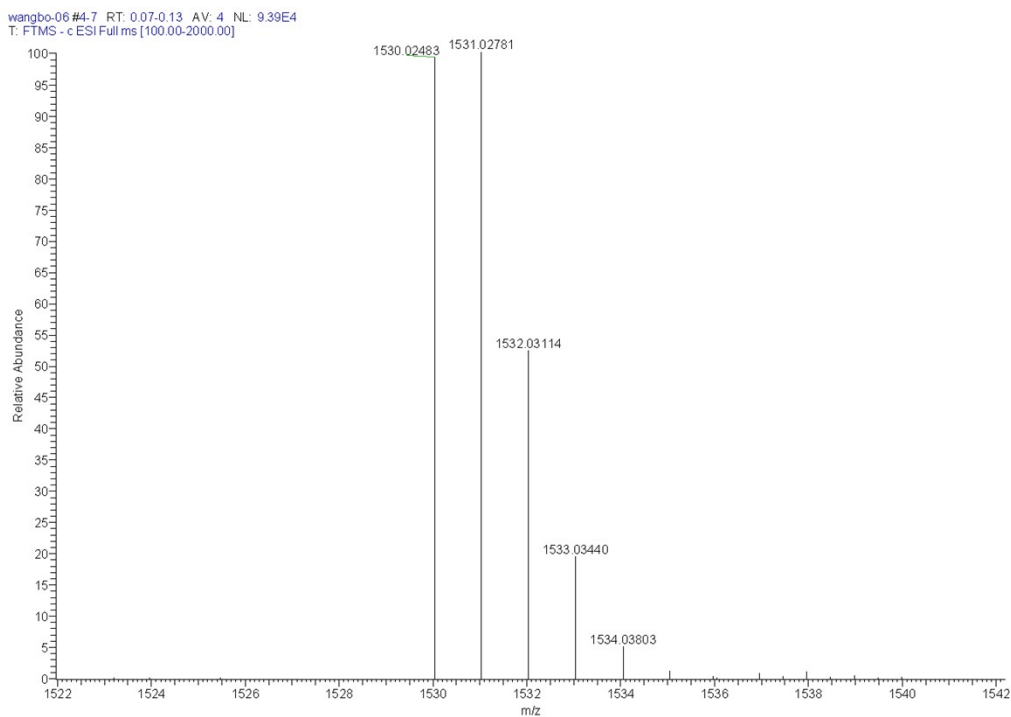

SPECTRUM - simulation:

| $m/z$      | Theo. Mass | Delta (ppm) | RDB equiv. | Composition                                          |
|------------|------------|-------------|------------|------------------------------------------------------|
| 1530.02483 | 1530.02597 | -0.75       | 24.5       | $\text{C}_{88}\text{H}_{137}\text{O}_{14}\text{N}_8$ |

Fig. S18. HR-ESI-MS of compound 6.

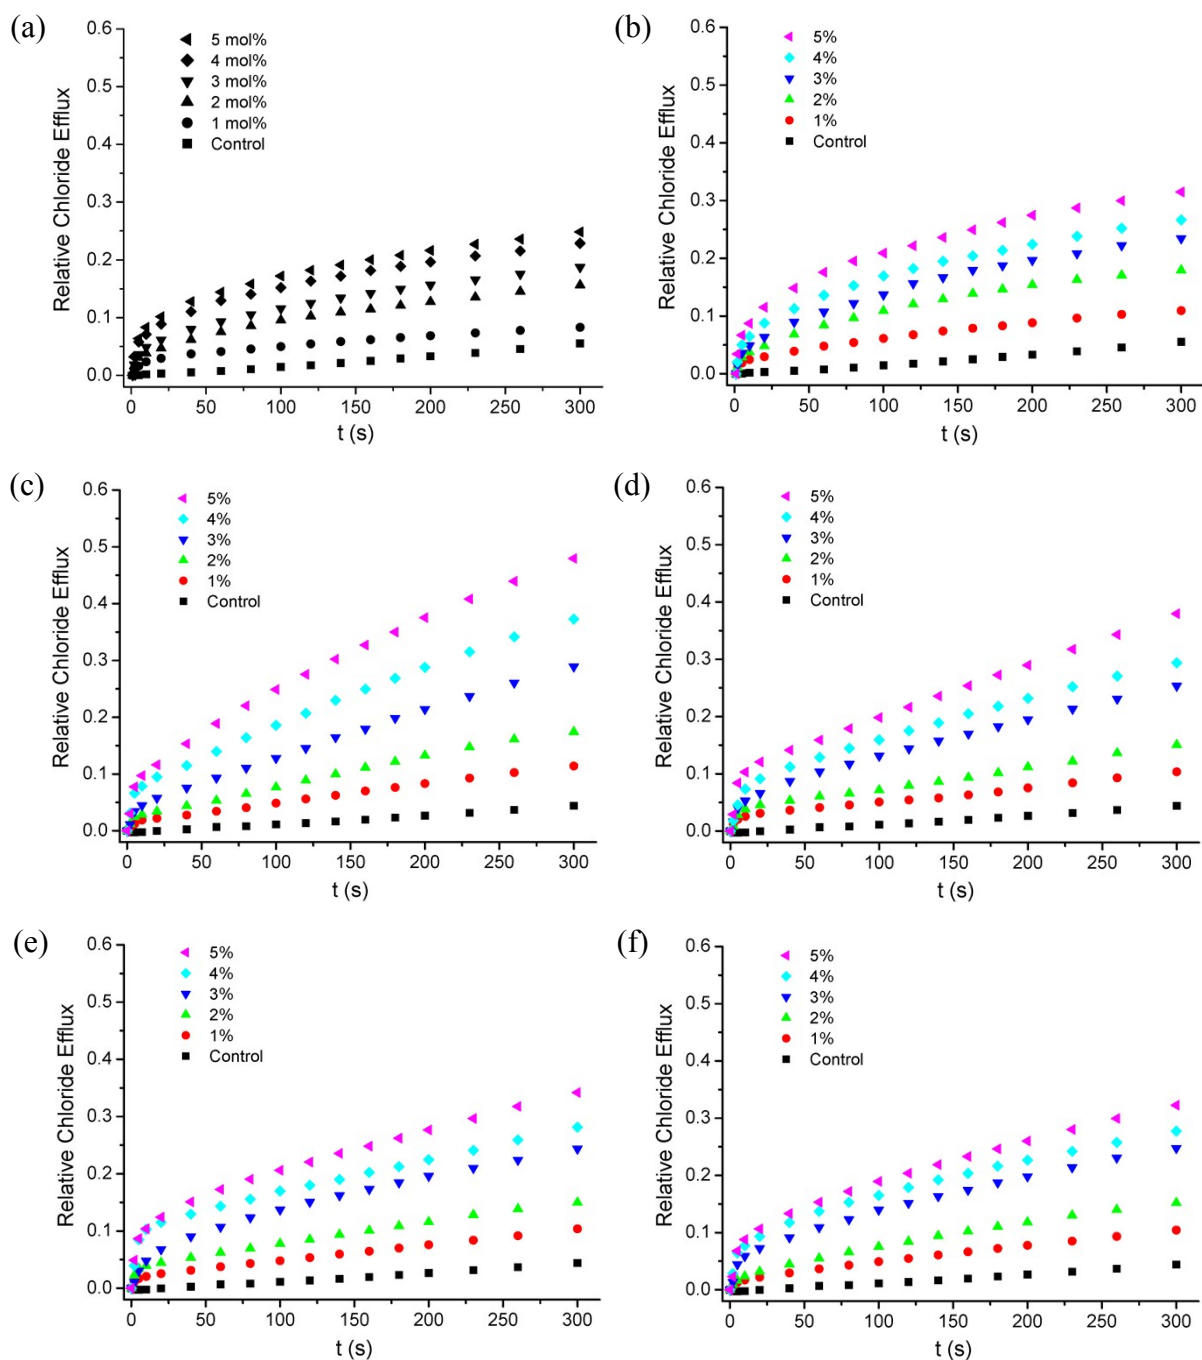

**Fig. S19.** Relative chloride efflux promoted by compounds **1** (a), **2** (b), **3** (c), **4** (d), **5** (e) and **6** (f) of varying concentrations in EYPC vesicles loaded with 500 mM NaCl buffered to pH 7.0 with 25 mM HEPES. The vesicles were dispersed in 500 mM NaNO<sub>3</sub> buffered to pH 7.0 with 25 mM HEPES.

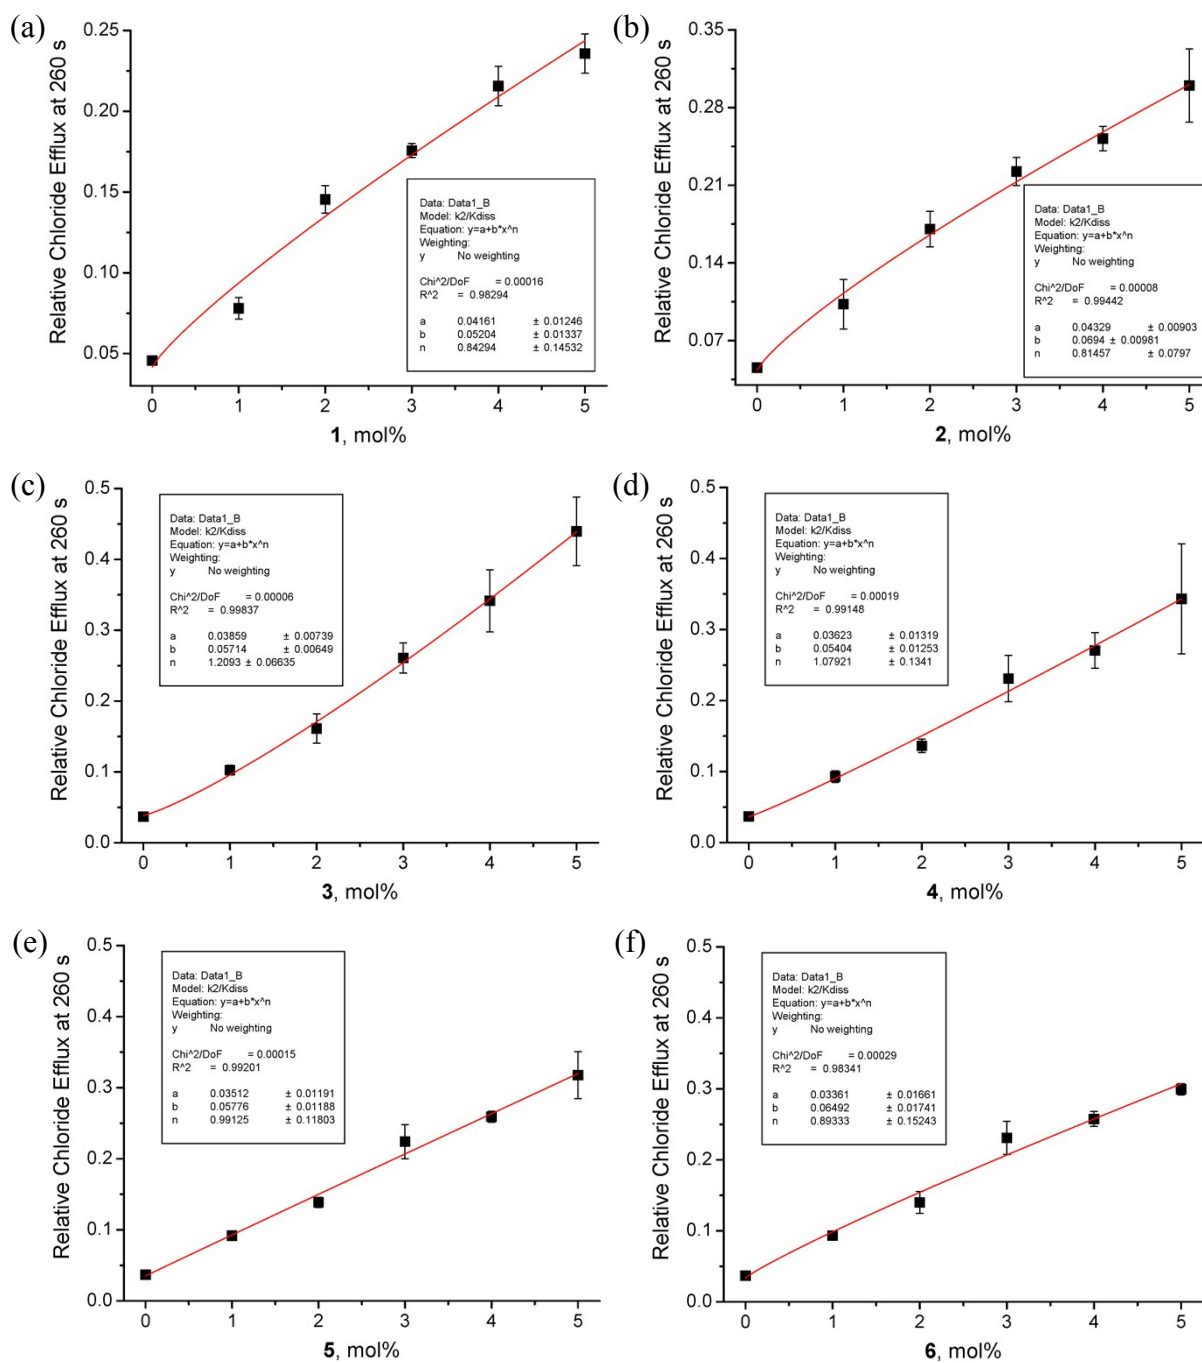

**Fig. S20.** Plots of the relative chloride efflux at 260 s against the mol% concentrations of compounds **1** (a), **2** (b), **3** (c), **4** (d), **5** (e) and **6** (f), according to the Eq.  $k_{\text{obs}} = k_0 + k_2 \times [\text{compound}]^n / K_{\text{diss}}$ .

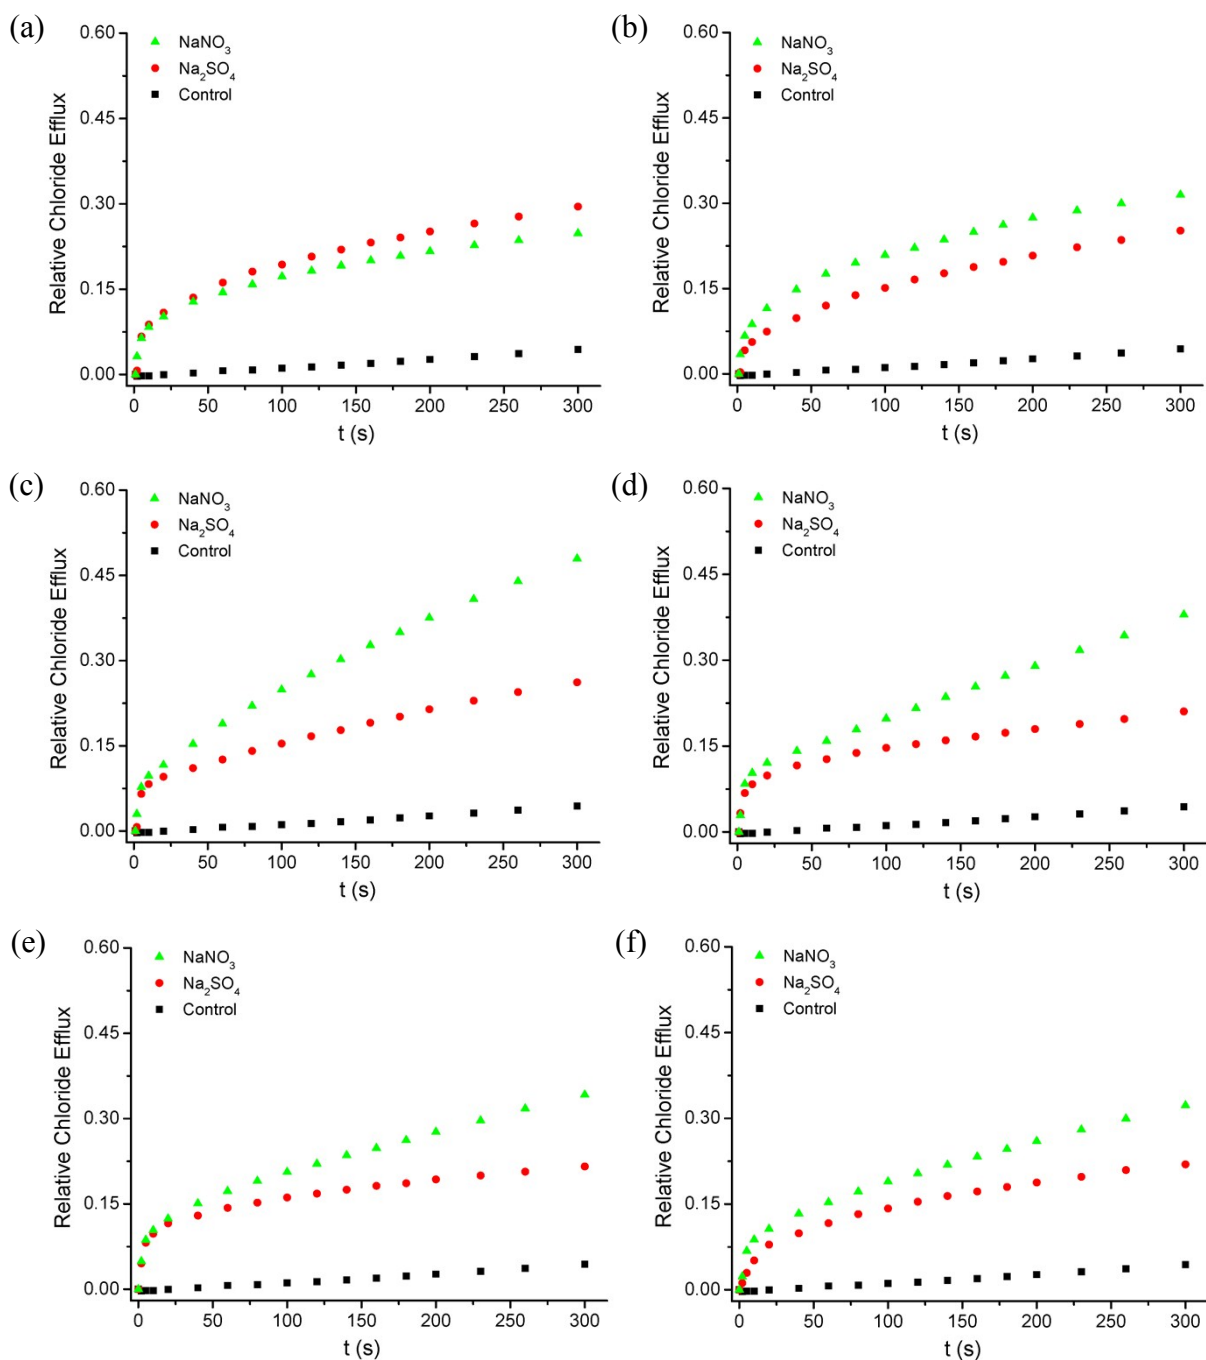

**Fig. S21.** (b) Relative chloride efflux, promoted by 5 mol% of compounds **1** (a), **2** (b), **3** (c), **4** (d), **5** (e) and **6** (f) in EYPC vesicles loaded with 500 mM NaCl buffered to pH 7.0 with 25 mM HEPES. The vesicles were dispersed in 25 mM HEPES buffer (pH 7.0) containing 500 mM NaNO<sub>3</sub> and 250 mM Na<sub>2</sub>SO<sub>4</sub>, respectively. The experiment that was conducted in NaNO<sub>3</sub> media with DMSO was used as a control.

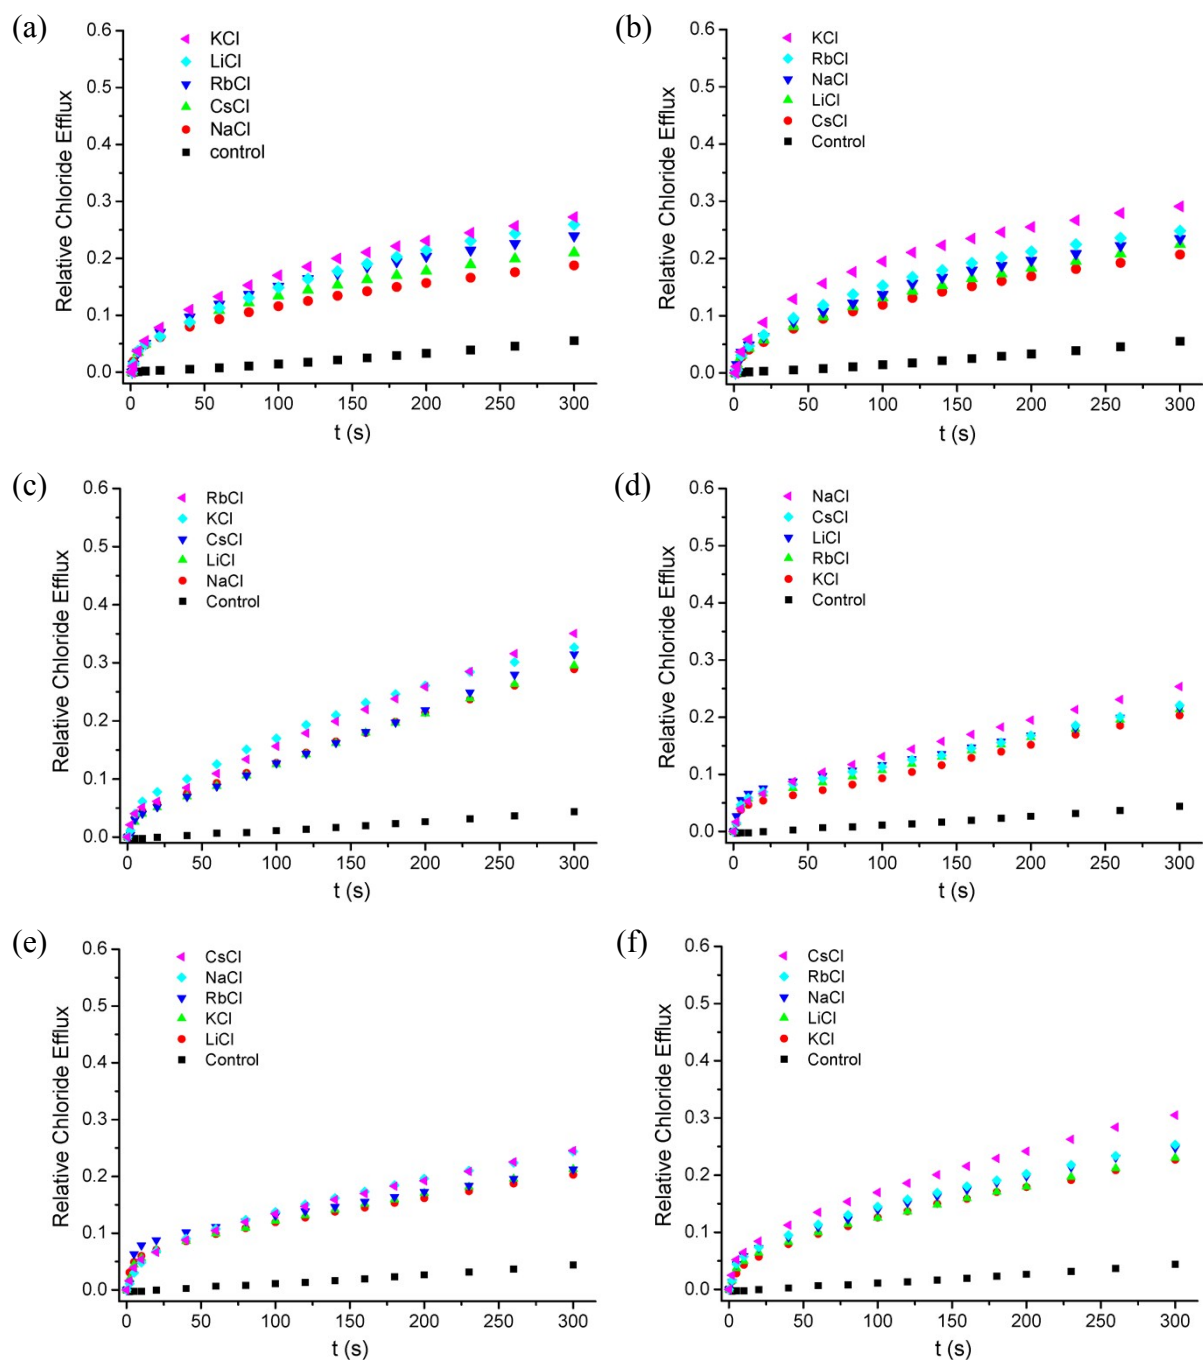

**Fig. S22.** Relative chloride efflux promoted by 3 mol% of compounds **1** (a), **2** (b), **3** (c), **4** (d), **5** (e) and **6** (f) in EYPC vesicles loaded with 500 mM MCl (M = Li, Na, K, Rb and Cs) buffered to pH 7.0 with 25 mM HEPES. The vesicles were dispersed in 500 mM NaNO<sub>3</sub> buffered to pH 7.0 with 25 mM HEPES.



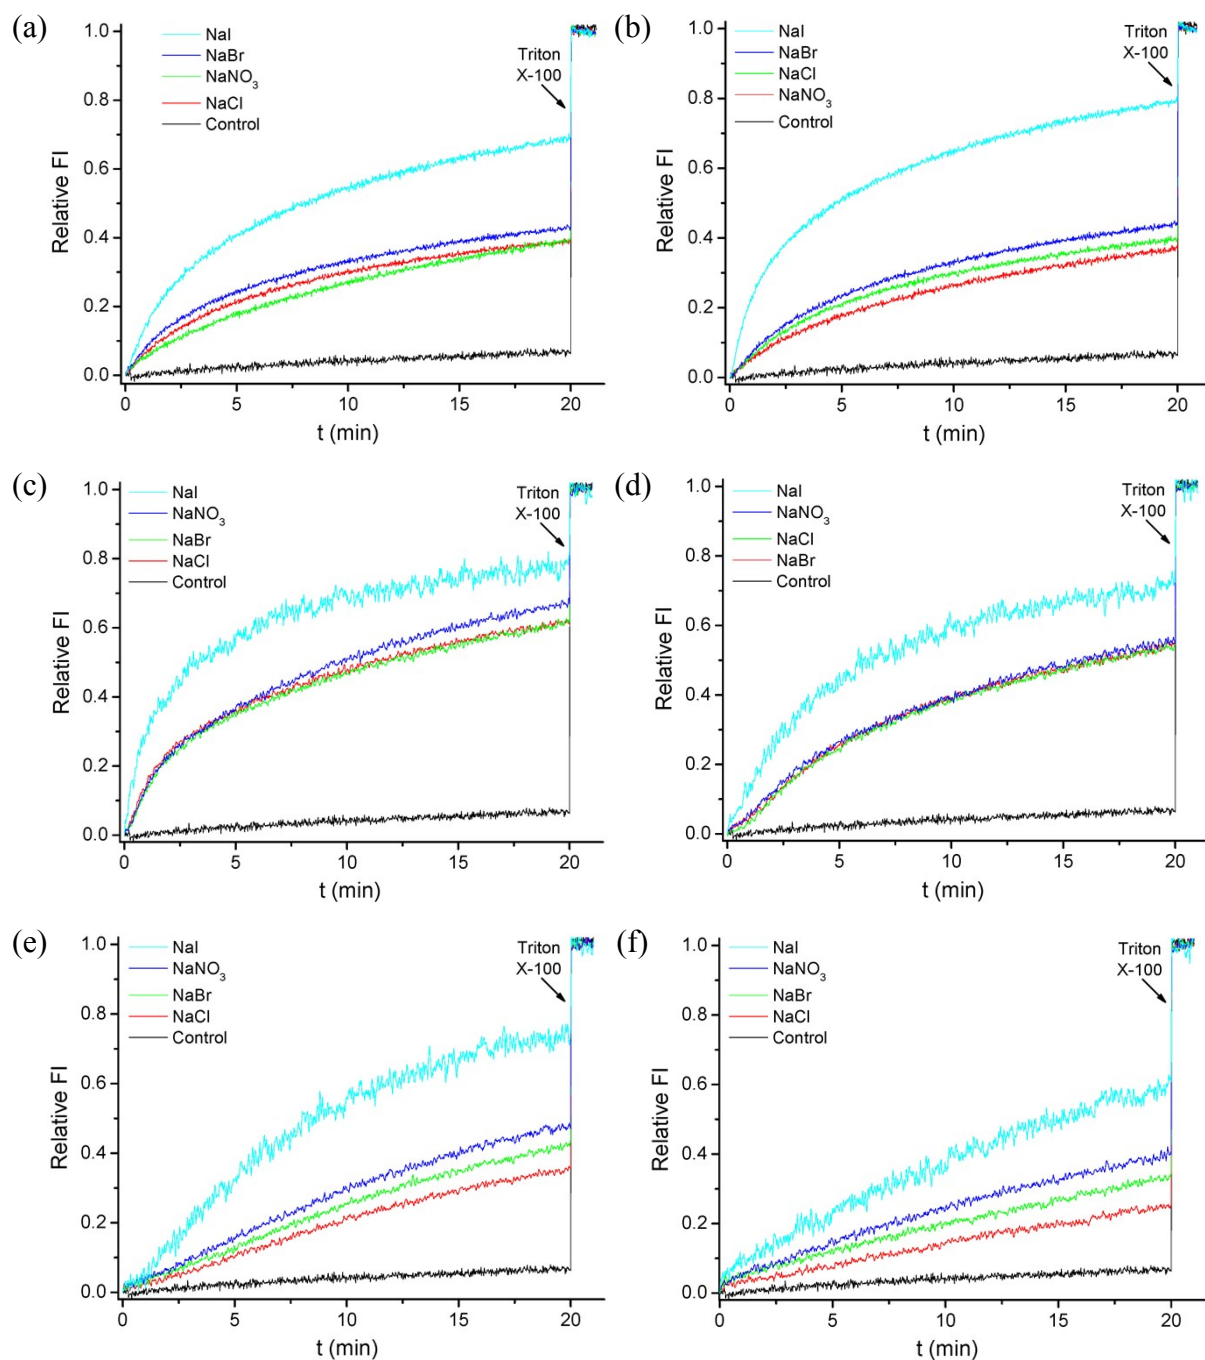

**Fig. S23.** Discharge of a pH gradient by 3 mol% of compounds **1** (a), **2** (b), **3** (c), **4** (d), **5** (e) and **6** (f) across EYPC-based liposomal membranes, under the measuring conditions of internal vesicles: 0.1 mM pyranine in 25 mM HEPES (50 mM NaX, pH 7.0) and external vesicles: 25 mM HEPES (50 mM NaX, pH 8.0) (X = NO<sub>3</sub>, Cl, Br and I). Ex 460 nm; em 510 nm. The experiment that was conducted in NaCl media with DMSO was used as a control.

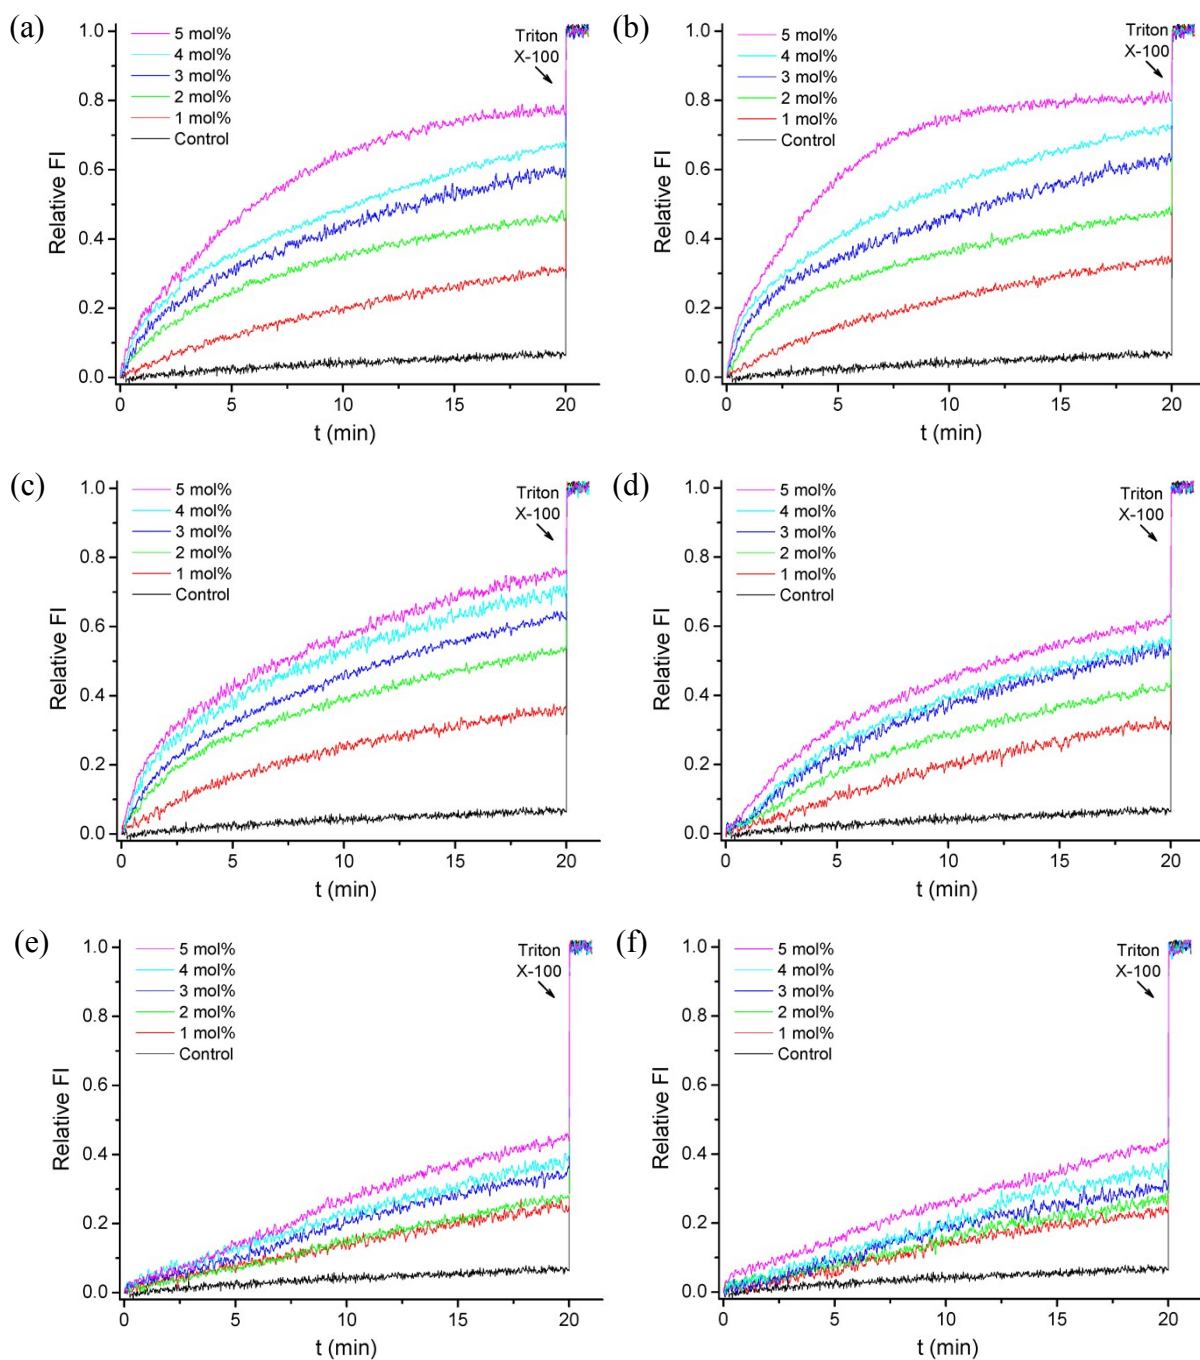

**Fig. S24.** Discharge of a pH gradient by compounds **1** (a), **2** (b), **3** (c), **4** (d), **5** (e) and **6** (f) of varying concentrations across EYPC-based liposomal membranes, under the measuring conditions of internal vesicles: 0.1 mM pyranine in 25 mM HEPES (50 mM NaCl, pH 7.0) and external vesicles: 25 mM HEPES (50 mM NaCl, pH 8.0). Ex 460 nm; em 510 nm. DMSO was used as a control.



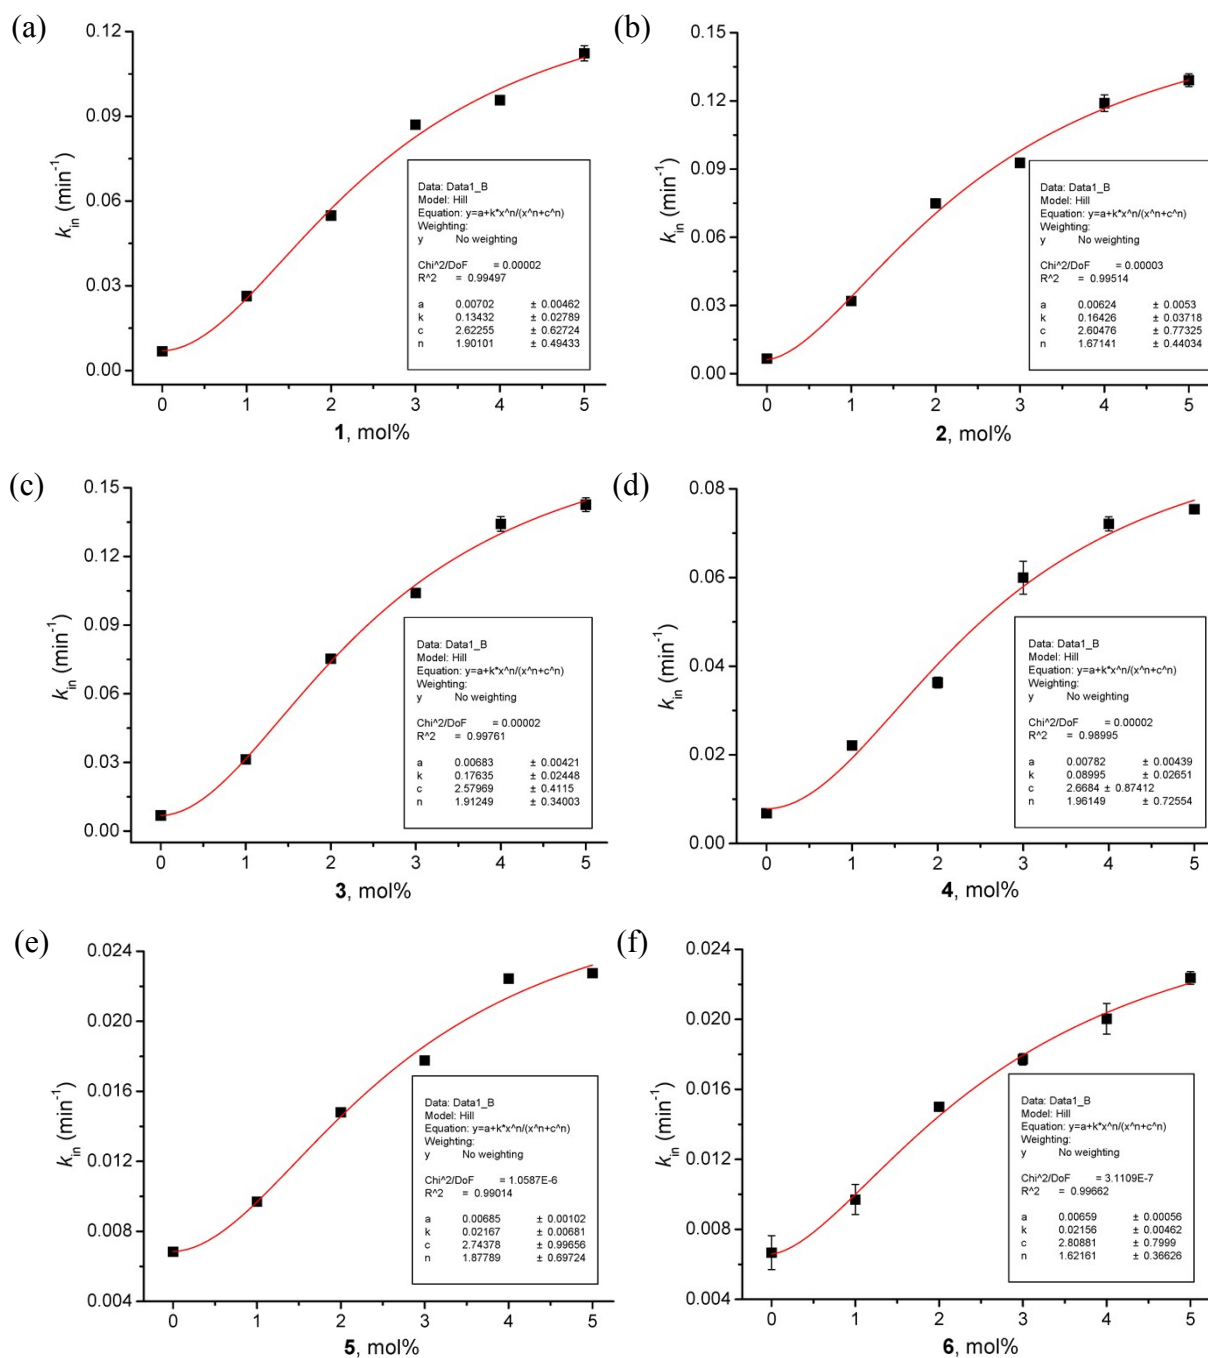

**Fig. S25.** Hill plots of the initial rate constants ( $k_{in}$ 's) against the mol% concentrations of compounds **1** (a), **2** (b), **3** (c), **4** (d), **5** (e) and **6** (f), according to the Eq.  $k_{in} = k_0 + k_{max} \times [\text{compound}]^n / ([\text{compound}]^n + [EC_{50}]^n)$ .
